# Supplementary material for: Perturbation and restoration of the fathead minnow gut microbiome after low-level triclosan exposure
Source: PubMed Central journal article supplement (PMC4374533; doi:10.1186/s40168-015-0069-6), 2015-03-03

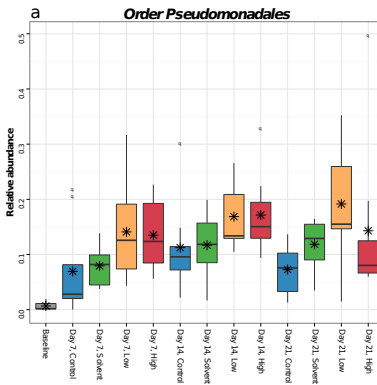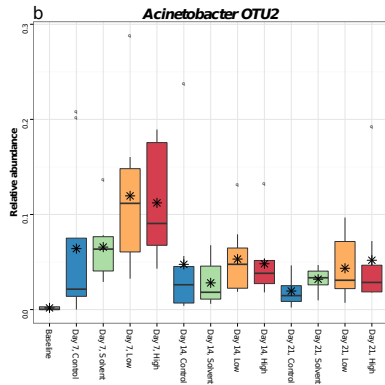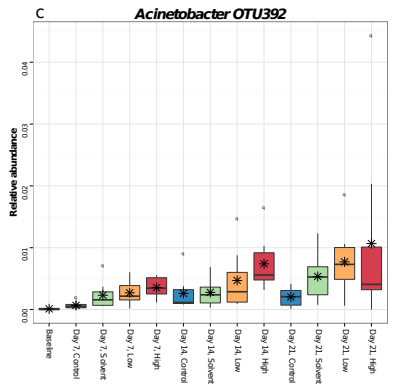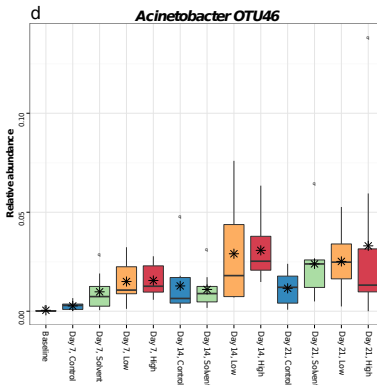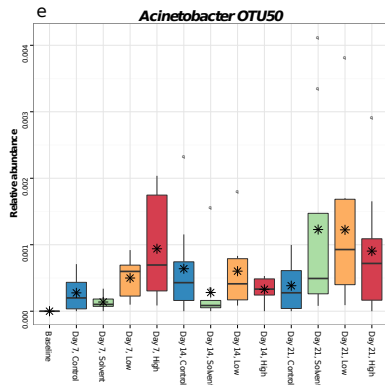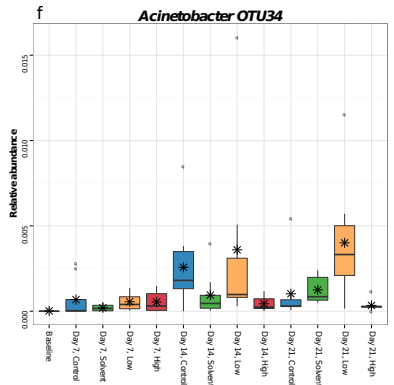

Supplement: 40168_2015_69_MOESM12_ESM.pdf [file 40168_2015_69_MOESM12_ESM.pdf]
